# Supplementary material for: Dysbindin Domain-Containing 1 in Prostate Cancer: New Insights into Bioinformatic Validation of Molecular and Immunological Features
Source: MDPI journal article supplement (doi:10.3390/ijms241511930), 2023-07-25
Supplement: s1 [file s1]

## THE SUPPLEMENTARY TABLES & FIGURES

### Supplementary Table S1

**Supplementary Table S1. The top 273 genes for the MetaCore analysis extracted from TCGA**

| No. | Correlated Gene | Spearman's Correlation | p-Value  |
|-----|-----------------|------------------------|----------|
| 1   | APRT            | 0.669646244            | 8.73E-65 |
| 2   | SLC25A10        | 0.585874288            | 2.61E-46 |
| 3   | ACY1            | 0.574263342            | 3.70E-44 |
| 4   | SLC25A39        | 0.561980496            | 5.66E-42 |
| 5   | PPP1R14B        | 0.558187831            | 2.56E-41 |
| 6   | PYCR1           | 0.542233971            | 1.20E-38 |
| 7   | POLD2           | 0.5406823              | 2.14E-38 |
| 8   | SIGMAR1         | 0.53733003             | 7.44E-38 |
| 9   | CGREF1          | 0.536231365            | 1.11E-37 |
| 10  | PPIA            | 0.535028926            | 1.73E-37 |
| 11  | RAC3            | 0.530840369            | 7.94E-37 |
| 12  | SPATA33         | 0.525009456            | 6.39E-36 |
| 13  | MRPL12          | 0.518974919            | 5.30E-35 |
| 14  | CTU2            | 0.515248621            | 1.92E-34 |
| 15  | PAFAH1B3        | 0.508719413            | 1.76E-33 |
| 16  | SAMD10          | 0.506656538            | 3.50E-33 |
| 17  | KATNB1          | 0.504363889            | 7.49E-33 |
| 18  | HMG20B          | 0.503243849            | 1.08E-32 |
| 19  | GAS8            | 0.502603921            | 1.34E-32 |
| 20  | POLDIP2         | 0.50159287             | 1.86E-32 |
| 21  | BSG             | 0.500848058            | 2.38E-32 |
| 22  | PPM1G           | 0.497974698            | 6.06E-32 |
| 23  | ALG3            | 0.496320092            | 1.03E-31 |
| 24  | GGCT            | 0.496293452            | 1.04E-31 |
| 25  | MFSD12          | 0.493107633            | 2.89E-31 |
| 26  | HMBS            | 0.492358394            | 3.67E-31 |
| 27  | SRM             | 0.489118262            | 1.02E-30 |
| 28  | RITA1           | 0.487664596            | 1.61E-30 |
| 29  | DDX49           | 0.487434033            | 1.73E-30 |
| 30  | GNB2            | 0.486549719            | 2.29E-30 |
| 31  | NMRAL1          | 0.485659739            | 3.02E-30 |
| 32  | NALF2           | 0.484133276            | 4.84E-30 |
| 33  | PGLS            | 0.483082213            | 6.70E-30 |
| 34  | TIMM13          | 0.482939472            | 7.00E-30 |
| 35  | NME1            | 0.478780589            | 2.50E-29 |

|    |          |             |          |
|----|----------|-------------|----------|
| 36 | ACOT8    | 0.477897217 | 3.27E-29 |
| 37 | SRD5A1   | 0.477878941 | 3.29E-29 |
| 38 | SLC4A5   | 0.477257598 | 3.97E-29 |
| 39 | FARSA    | 0.475614375 | 6.51E-29 |
| 40 | NPRL2    | 0.475219222 | 7.33E-29 |
| 41 | DDX41    | 0.473027842 | 1.41E-28 |
| 42 | HSD17B10 | 0.473027635 | 1.41E-28 |
| 43 | ASPHD1   | 0.472892716 | 1.47E-28 |
| 44 | AP1M2    | 0.472646343 | 1.58E-28 |
| 45 | UQCC3    | 0.472373948 | 1.72E-28 |
| 46 | ZNF524   | 0.472325016 | 1.74E-28 |
| 47 | SLC27A5  | 0.471544684 | 2.20E-28 |
| 48 | NUTF2    | 0.471470556 | 2.25E-28 |
| 49 | PKP3     | 0.471282099 | 2.37E-28 |
| 50 | SAPCD2   | 0.47083272  | 2.71E-28 |
| 51 | STK32C   | 0.47046729  | 3.02E-28 |
| 52 | DNPH1    | 0.469302643 | 4.26E-28 |
| 53 | DTYMK    | 0.468654724 | 5.16E-28 |
| 54 | C19ORF54 | 0.468553686 | 5.31E-28 |
| 55 | FIBP     | 0.466609183 | 9.39E-28 |
| 56 | RABGGTA  | 0.466551334 | 9.55E-28 |
| 57 | SLC19A1  | 0.466114243 | 1.09E-27 |
| 58 | B3GAT3   | 0.46521435  | 1.41E-27 |
| 59 | CHMP1A   | 0.464441154 | 1.76E-27 |
| 60 | CENPX    | 0.464351526 | 1.81E-27 |
| 61 | TKFC     | 0.46416015  | 1.91E-27 |
| 62 | SSC4D    | 0.463745505 | 2.16E-27 |
| 63 | DHPS     | 0.463473548 | 2.34E-27 |
| 64 | MAZ      | 0.462664704 | 2.95E-27 |
| 65 | CENPBD1P | 0.462362468 | 3.22E-27 |
| 66 | POP7     | 0.461627478 | 3.98E-27 |
| 67 | ZP3      | 0.461409707 | 4.23E-27 |
| 68 | AP1S1    | 0.461281679 | 4.39E-27 |
| 69 | KARS1    | 0.460913346 | 4.88E-27 |
| 70 | YIF1A    | 0.460313171 | 5.79E-27 |
| 71 | RUVBL2   | 0.459960171 | 6.41E-27 |
| 72 | PRR19    | 0.459667435 | 6.97E-27 |
| 73 | CENPM    | 0.459271647 | 7.80E-27 |
| 74 | MCRIP2   | 0.458891658 | 8.69E-27 |
| 75 | HYAL3    | 0.457926196 | 1.14E-26 |
| 76 | PRELID1  | 0.457920012 | 1.15E-26 |
| 77 | MLST8    | 0.457192754 | 1.41E-26 |

|     |          |             |          |
|-----|----------|-------------|----------|
| 78  | MRTO4    | 0.456809679 | 1.57E-26 |
| 79  | DEAF1    | 0.455771925 | 2.10E-26 |
| 80  | PGAP2    | 0.455697785 | 2.15E-26 |
| 81  | HGH1     | 0.455097857 | 2.54E-26 |
| 82  | NHP2     | 0.454806153 | 2.76E-26 |
| 83  | TOMM40   | 0.454505529 | 3.00E-26 |
| 84  | SLC2A4RG | 0.454244533 | 3.23E-26 |
| 85  | IDH3G    | 0.453905124 | 3.55E-26 |
| 86  | NELFCD   | 0.453834082 | 3.62E-26 |
| 87  | DUS1L    | 0.453796393 | 3.66E-26 |
| 88  | MPST     | 0.452852202 | 4.77E-26 |
| 89  | PYCR3    | 0.452768253 | 4.88E-26 |
| 90  | TRAPPC2L | 0.452392974 | 5.42E-26 |
| 91  | SPDEF    | 0.451988346 | 6.07E-26 |
| 92  | ECE2     | 0.451731039 | 6.51E-26 |
| 93  | AKT1     | 0.451627356 | 6.71E-26 |
| 94  | PLEKHJ1  | 0.451275659 | 7.39E-26 |
| 95  | ECHS1    | 0.451047729 | 7.88E-26 |
| 96  | LRFN1    | 0.451013281 | 7.95E-26 |
| 97  | ELMO3    | 0.450743468 | 8.57E-26 |
| 98  | NCLN     | 0.450368085 | 9.51E-26 |
| 99  | EIF3B    | 0.449416563 | 1.24E-25 |
| 100 | MRPS2    | 0.449175312 | 1.32E-25 |
| 101 | MON1A    | 0.448254033 | 1.70E-25 |
| 102 | ZNF511   | 0.448126085 | 1.76E-25 |
| 103 | AKT1S1   | 0.448010332 | 1.82E-25 |
| 104 | PRMT7    | 0.4478445   | 1.91E-25 |
| 105 | EXOSC5   | 0.447732465 | 1.97E-25 |
| 106 | ATP6V1F  | 0.447617189 | 2.03E-25 |
| 107 | EEF2KMT  | 0.447370156 | 2.17E-25 |
| 108 | RUVBL1   | 0.447095478 | 2.34E-25 |
| 109 | CDT1     | 0.447025664 | 2.39E-25 |
| 110 | PRR7     | 0.447015648 | 2.39E-25 |
| 111 | PODXL2   | 0.446003732 | 3.15E-25 |
| 112 | CPNE7    | 0.445528332 | 3.59E-25 |
| 113 | DPM2     | 0.444798596 | 4.38E-25 |
| 114 | MCAT     | 0.444672323 | 4.53E-25 |
| 115 | MRPS24   | 0.444597966 | 4.62E-25 |
| 116 | ESRP2    | 0.444147555 | 5.23E-25 |
| 117 | RPUSD1   | 0.442613245 | 7.91E-25 |
| 118 | SYNGR2   | 0.441233305 | 1.15E-24 |
| 119 | LSM4     | 0.440830289 | 1.28E-24 |

|     |         |             |          |
|-----|---------|-------------|----------|
| 120 | BDH1    | 0.440436165 | 1.42E-24 |
| 121 | TCF25   | 0.440254832 | 1.49E-24 |
| 122 | BCS1L   | 0.440127206 | 1.54E-24 |
| 123 | MRPS15  | 0.439359792 | 1.89E-24 |
| 124 | TRUB2   | 0.43923485  | 1.96E-24 |
| 125 | NR2F6   | 0.438713873 | 2.25E-24 |
| 126 | MOSPD3  | 0.438459796 | 2.41E-24 |
| 127 | FMC1    | 0.438054715 | 2.68E-24 |
| 128 | PCBD1   | 0.437084193 | 3.47E-24 |
| 129 | DPCD    | 0.436926725 | 3.62E-24 |
| 130 | MRPL48  | 0.435359991 | 5.47E-24 |
| 131 | LAGE3   | 0.435180942 | 5.73E-24 |
| 132 | BPHL    | 0.435048772 | 5.93E-24 |
| 133 | MARCHF9 | 0.434954704 | 6.08E-24 |
| 134 | RFXANK  | 0.434876538 | 6.21E-24 |
| 135 | MRPL15  | 0.434644322 | 6.60E-24 |
| 136 | PAM16   | 0.434567693 | 6.73E-24 |
| 137 | YIF1B   | 0.434314412 | 7.20E-24 |
| 138 | METTL26 | 0.434140618 | 7.53E-24 |
| 139 | TBRG4   | 0.433835812 | 8.16E-24 |
| 140 | RPL13   | 0.43382248  | 8.19E-24 |
| 141 | RRP9    | 0.433321782 | 9.33E-24 |
| 142 | MRPS34  | 0.432700582 | 1.10E-23 |
| 143 | COA4    | 0.432617253 | 1.12E-23 |
| 144 | BTBD2   | 0.432487768 | 1.16E-23 |
| 145 | RAD23A  | 0.431947419 | 1.34E-23 |
| 146 | CORO1B  | 0.430542697 | 1.92E-23 |
| 147 | FAAP100 | 0.430408255 | 1.99E-23 |
| 148 | POLR2H  | 0.429964039 | 2.24E-23 |
| 149 | ZMYND19 | 0.429813283 | 2.32E-23 |
| 150 | DANCR   | 0.429764648 | 2.35E-23 |
| 151 | EIPR1   | 0.429512079 | 2.51E-23 |
| 152 | CLPP    | 0.427471466 | 4.25E-23 |
| 153 | IFI27L1 | 0.427463153 | 4.26E-23 |
| 154 | CDK16   | 0.427359254 | 4.37E-23 |
| 155 | CBS     | 0.427065072 | 4.71E-23 |
| 156 | NDUFA7  | 0.426957477 | 4.85E-23 |
| 157 | PDZD11  | 0.426525881 | 5.41E-23 |
| 158 | CACFD1  | 0.42589455  | 6.36E-23 |
| 159 | AP2S1   | 0.42558901  | 6.87E-23 |
| 160 | TPRN    | 0.425064655 | 7.86E-23 |
| 161 | YBEY    | 0.424738566 | 8.54E-23 |

|     |          |             |          |
|-----|----------|-------------|----------|
| 162 | EMC10    | 0.424729067 | 8.56E-23 |
| 163 | NAA10    | 0.424649248 | 8.73E-23 |
| 164 | SPATA2L  | 0.424328189 | 9.47E-23 |
| 165 | MARVELD3 | 0.423927681 | 1.05E-22 |
| 166 | TALDO1   | 0.42375111  | 1.10E-22 |
| 167 | ATAD3A   | 0.423545627 | 1.16E-22 |
| 168 | SNRPA    | 0.422887254 | 1.36E-22 |
| 169 | COX5A    | 0.422812764 | 1.39E-22 |
| 170 | KRT18    | 0.422755394 | 1.41E-22 |
| 171 | PEBP1    | 0.422175353 | 1.63E-22 |
| 172 | MTX1     | 0.420919054 | 2.24E-22 |
| 173 | CINP     | 0.420715326 | 2.36E-22 |
| 174 | CDK10    | 0.420677533 | 2.38E-22 |
| 175 | NDUFAF3  | 0.420509739 | 2.48E-22 |
| 176 | RNASEH2A | 0.420437624 | 2.53E-22 |
| 177 | SYNE4    | 0.420295995 | 2.62E-22 |
| 178 | CAMK2B   | 0.419009917 | 3.61E-22 |
| 179 | TIMM50   | 0.418319638 | 4.29E-22 |
| 180 | GTF3A    | 0.418026654 | 4.61E-22 |
| 181 | MFSD3    | 0.41796918  | 4.68E-22 |
| 182 | NCBP2AS2 | 0.416980382 | 5.98E-22 |
| 183 | LBHD1    | 0.416779442 | 6.28E-22 |
| 184 | NOP16    | 0.41676323  | 6.31E-22 |
| 185 | DHODH    | 0.416725448 | 6.37E-22 |
| 186 | SMARCD2  | 0.416077494 | 7.47E-22 |
| 187 | CLN6     | 0.416073983 | 7.48E-22 |
| 188 | KDF1     | 0.41598198  | 7.65E-22 |
| 189 | MRPL41   | 0.415901852 | 7.80E-22 |
| 190 | MRPS33   | 0.415875274 | 7.86E-22 |
| 191 | RPP25L   | 0.415787401 | 8.03E-22 |
| 192 | P4HTM    | 0.415733615 | 8.14E-22 |
| 193 | NME2     | 0.415649283 | 8.31E-22 |
| 194 | ATP5MC1  | 0.415574421 | 8.46E-22 |
| 195 | SGTA     | 0.415560791 | 8.49E-22 |
| 196 | KCTD13   | 0.415316906 | 9.02E-22 |
| 197 | MRPS12   | 0.414827763 | 1.02E-21 |
| 198 | CFAP65   | 0.414392633 | 1.13E-21 |
| 199 | TMEM161A | 0.414333054 | 1.15E-21 |
| 200 | NKIRAS2  | 0.414169596 | 1.20E-21 |
| 201 | ALKBH2   | 0.414103408 | 1.21E-21 |
| 202 | MRPL57   | 0.414090976 | 1.22E-21 |
| 203 | NDUFB10  | 0.41394151  | 1.26E-21 |

|     |            |             |          |
|-----|------------|-------------|----------|
| 204 | CDKN2AIPNL | 0.413867567 | 1.29E-21 |
| 205 | FAM174C    | 0.41358051  | 1.38E-21 |
| 206 | FAM89B     | 0.413466822 | 1.42E-21 |
| 207 | DHRS11     | 0.413278501 | 1.49E-21 |
| 208 | ERAL1      | 0.413059377 | 1.57E-21 |
| 209 | TUFM       | 0.412887721 | 1.64E-21 |
| 210 | EIF3I      | 0.412558628 | 1.77E-21 |
| 211 | TIMM17B    | 0.412301319 | 1.89E-21 |
| 212 | GLOD5      | 0.412076619 | 1.99E-21 |
| 213 | THEM6      | 0.411609212 | 2.23E-21 |
| 214 | HSPBP1     | 0.411580723 | 2.25E-21 |
| 215 | SNRNP25    | 0.411414054 | 2.34E-21 |
| 216 | MRPL37     | 0.411318953 | 2.40E-21 |
| 217 | PRELID1P6  | 0.411055129 | 2.56E-21 |
| 218 | DESI1      | 0.411023388 | 2.58E-21 |
| 219 | TTLL1      | 0.410748763 | 2.75E-21 |
| 220 | NFS1       | 0.410324269 | 3.05E-21 |
| 221 | CSKMT      | 0.410229272 | 3.12E-21 |
| 222 | SLC29A2    | 0.410181392 | 3.16E-21 |
| 223 | UBE2M      | 0.410070255 | 3.25E-21 |
| 224 | ATPAF2     | 0.410038049 | 3.27E-21 |
| 225 | TRPT1      | 0.409882945 | 3.40E-21 |
| 226 | COPE       | 0.409674127 | 3.57E-21 |
| 227 | EPN1       | 0.409334449 | 3.88E-21 |
| 228 | ADM2       | 0.409247185 | 3.96E-21 |
| 229 | RNF187     | 0.409240691 | 3.97E-21 |
| 230 | TMEM208    | 0.408320445 | 4.95E-21 |
| 231 | DVL1       | 0.408219056 | 5.07E-21 |
| 232 | DCXR       | 0.407801636 | 5.61E-21 |
| 233 | RALY       | 0.407792147 | 5.62E-21 |
| 234 | ANAPC11    | 0.407767726 | 5.65E-21 |
| 235 | TREX1      | 0.407720206 | 5.72E-21 |
| 236 | GPS1       | 0.407452872 | 6.10E-21 |
| 237 | NDOR1      | 0.406824857 | 7.09E-21 |
| 238 | SLIRP      | 0.406740815 | 7.23E-21 |
| 239 | BOLA3      | 0.406421118 | 7.80E-21 |
| 240 | TAF10      | 0.406071445 | 8.48E-21 |
| 241 | TTLL12     | 0.406018825 | 8.59E-21 |
| 242 | TXN        | 0.405945408 | 8.74E-21 |
| 243 | TRPM4      | 0.405902247 | 8.83E-21 |
| 244 | PDF        | 0.405870237 | 8.90E-21 |
| 245 | PDXP       | 0.40584563  | 8.95E-21 |

|     |          |             |          |
|-----|----------|-------------|----------|
| 246 | OXLD1    | 0.405813548 | 9.02E-21 |
| 247 | TUBB4A   | 0.405673737 | 9.33E-21 |
| 248 | GATD3    | 0.405582973 | 9.53E-21 |
| 249 | OAZ1     | 0.405548072 | 9.61E-21 |
| 250 | GARIN5A  | 0.405338355 | 1.01E-20 |
| 251 | NOP10    | 0.404771365 | 1.16E-20 |
| 252 | BOLA2    | 0.404765996 | 1.16E-20 |
| 253 | ASPSCR1  | 0.404573213 | 1.21E-20 |
| 254 | ITPA     | 0.404334377 | 1.28E-20 |
| 255 | C2CD2L   | 0.404017995 | 1.38E-20 |
| 256 | H2AC17   | 0.402944277 | 1.78E-20 |
| 257 | ELL3     | 0.402862641 | 1.82E-20 |
| 258 | CDK5     | 0.402722933 | 1.88E-20 |
| 259 | MYL5     | 0.402705689 | 1.89E-20 |
| 260 | ZNF821   | 0.402424828 | 2.02E-20 |
| 261 | FKBP4    | 0.402336253 | 2.06E-20 |
| 262 | C19ORF73 | 0.40228068  | 2.09E-20 |
| 263 | RAB1B    | 0.402043496 | 2.20E-20 |
| 264 | USE1     | 0.402025426 | 2.21E-20 |
| 265 | RANGAP1  | 0.40185536  | 2.30E-20 |
| 266 | PDCD2L   | 0.401407334 | 2.56E-20 |
| 267 | PRDX4    | 0.401057795 | 2.78E-20 |
| 268 | SOX12    | 0.400517725 | 3.16E-20 |
| 269 | MICOS13  | 0.400486366 | 3.18E-20 |
| 270 | MRPS17   | 0.400332718 | 3.29E-20 |
| 271 | PPP1CA   | 0.400136734 | 3.45E-20 |
| 272 | GLRX5    | 0.400067758 | 3.51E-20 |
| 273 | WBP1     | 0.400021808 | 3.54E-20 |

### **Supplementary Table S2**

**Supplementary Table S2. Pathway maps and network objects in the MetaCore analysis.**

| <b>No.</b> | <b>Enrichment of pathway maps</b>                                                                  | <b>p-Value</b> | <b>Network Objects from Active Data</b>                          |
|------------|----------------------------------------------------------------------------------------------------|----------------|------------------------------------------------------------------|
| 1          | Regulation of GSK3 beta in bipolar disorder                                                        | 3.640E-05      | AKT1, DVL-1, AKT(PKB), Dsh, PP1-cat                              |
| 2          | ATP/ITP metabolism                                                                                 | 6.907E-05      | ITPA, APRT, NDPK A, NDPK B, RPB8, NDPK complex, RRP46            |
| 3          | GTP-XTP metabolism                                                                                 | 9.711E-05      | ITPA, NDPK A, NDPK B, RPB8, NDPK complex, RRP46                  |
| 4          | TTP metabolism                                                                                     | 2.397E-04      | NDPK A, NDPK B, NDPK complex, Thymidylate kinase, POLD reg (p50) |
| 5          | CTP/UTP metabolism                                                                                 | 2.518E-04      | ITPA, NDPK A, NDPK B, RPB8, NDPK complex, RRP46                  |
| 6          | Role of activation of WNT signaling in the progression of lung cancer                              | 4.285E-04      | DVL-1, ARD1, CD147, Dsh, RUVBL1                                  |
| 7          | Inhibition of remyelination in multiple sclerosis: regulation of cytoskeleton proteins             | 4.607E-04      | Tubulin beta, CDK5, MRLC, Tubulin beta 4                         |
| 8          | GTP metabolism                                                                                     | 1.008E-03      | ITPA, NDPK A, NDPK B, NDPK complex                               |
| 9          | dATP/dITP metabolism                                                                               | 1.066E-03      | ITPA, NDPK A, NDPK B, NDPK complex, POLD reg (p50)               |
| 10         | Development_Regulation of cytoskeleton proteins in oligodendrocyte differentiation and myelination | 1.405E-03      | Tubulin beta, CDK5, MRLC, Tubulin beta 4                         |
| 11         | Neuroprotective action of lithium                                                                  | 1.793E-03      | CDK5, Thioredoxin, Dsh, PP1-cat                                  |
| 12         | dGTP metabolism                                                                                    | 1.901E-03      | NDPK A, NDPK B, NDPK complex, POLD reg (p50)                     |
| 13         | Deregulation of canonical WNT signaling in major depressive disorder                               | 2.073E-03      | AKT1, DVL-1, Dsh                                                 |
| 14         | G-protein signaling_Rac1 inhibition                                                                | 2.073E-03      | CDK5, AKT1, NDPK A                                               |
| 15         | N-Glycan biosynthesis p1                                                                           | 2.927E-03      | DPM2 (reg), ALG10-A, ALG3, OST48                                 |
| 16         | Signal transduction_mTORC1 upstream signaling                                                      | 3.233E-03      | PRAS40, GBL, AKT(PKB), Dsh                                       |
| 17         | dCTP/dUTP metabolism                                                                               | 3.233E-03      | NDPK A, NDPK B, NDPK complex, POLD reg (p50)                     |
| 18         | Translation_Regulation of EIF2 activity                                                            | 3.731E-03      | PP1-cat alpha, AKT(PKB), PP1-cat                                 |
| 19         | Butanoic acid metabolism                                                                           | 4.018E-03      | ECHS1, PTE1, HCD2                                                |
| 20         | CHDI_DEGs from Replication data_Causal network                                                     | 4.473E-03      | CDK5, AKT(PKB), Dsh, PP1-cat                                     |
| 21         | Apoptosis and survival_BAD phosphorylation                                                         | 4.958E-03      | PP1-cat alpha, PP2C, AKT(PKB)                                    |



|    |                                                                                                              |           |                                     |
|----|--------------------------------------------------------------------------------------------------------------|-----------|-------------------------------------|
| 22 | Development_Role of CDK5 in the nervous system                                                               | 5.764E-03 | Tubulin beta, CDK5, PCTK1, AKT(PKB) |
| 23 | Neurophysiological process_HTR2A signaling in the nervous system                                             | 7.633E-03 | SFK, AKT(PKB), SRD5A1               |
| 24 | Development_NOTCH signaling inhibition                                                                       | 8.429E-03 | Presenilin 2, AKT1, RITA1, AKT(PKB) |
| 25 | LRRK2 in neuronal apoptosis in Parkinson's disease                                                           | 8.454E-03 | AKT1, Thioredoxin                   |
| 26 | Transport_RAN regulation pathway                                                                             | 9.460E-03 | NTF2, RanGAP1                       |
| 27 | ATP metabolism                                                                                               | 1.036E-02 | ITPA, NDPK A, NDPK B, NDPK complex  |
| 28 | Aberrant B-Raf signaling in melanoma progression                                                             | 1.049E-02 | AKT1, RKIP, AKT(PKB)                |
| 29 | Cytoskeleton remodeling_Alpha-1A adrenergic receptor-dependent inhibition of PI3K                            | 1.052E-02 | MRLC, AKT(PKB)                      |
| 30 | Cell adhesion_Desmosomes                                                                                     | 1.052E-02 | Plakophilin 3, Keratin 18           |
| 31 | Cytoskeleton remodeling_Regulation of actin cytoskeleton organization by the kinase effectors of Rho GTPases | 1.212E-02 | Rac3, MRLC, Rac1-related            |
| 32 | Development_H3K9 demethylases in pluripotency maintenance of stem cells                                      | 1.398E-02 | AKT1, AKT(PKB)                      |
| 33 | Inhibition of GSK3 beta by lithium in major depressive disorder                                              | 1.398E-02 | AKT(PKB), PP1-cat                   |
| 34 | Stem cells_Aberrant Wnt signaling in medulloblastoma stem cells                                              | 1.523E-02 | AKT(PKB), Dsh                       |
| 35 | Canonical WNT signaling pathway in colorectal cancer                                                         | 1.714E-02 | AKT1, DVL-1, Dsh                    |
| 36 | Development_ErbB4 signaling                                                                                  | 1.784E-02 | CDK5, SFK, AKT(PKB)                 |
| 37 | Ligand-independent activation of Androgen receptor in Prostate Cancer                                        | 1.784E-02 | NCOA3 (pCIP/SRC3), AKT(PKB), SRD5A1 |
| 38 | Apoptosis and survival_Role of nuclear PI3K in NGF/ TrkA signaling                                           | 1.787E-02 | AKT1, AKT(PKB)                      |
| 39 | Signal transduction_mTORC2 downstream signaling                                                              | 1.856E-02 | AKT1, PRAS40, AKT(PKB)              |
| 40 | Nicotine / nAChR alpha-3/nAChR beta-2 signaling in NSCLC                                                     | 1.925E-02 | AKT1, AKT(PKB)                      |
| 41 | Transcription_Negative regulation of HIF1A function                                                          | 1.929E-02 | PRDX4, ARD1, RUVBL2                 |
| 42 | Signal transduction_Ephrin reverse signaling                                                                 | 2.216E-02 | MRLC, SFK                           |
| 43 | CHDI_Correlations from Discovery data_Causal network                                                         | 2.236E-02 | CDK5, AKT(PKB), Dsh                 |
| 44 | Development_Positive regulation of WNT/Beta-catenin signaling in the cytoplasm                               | 2.483E-02 | AKT(PKB), Dsh, PP1-cat              |
| 45 | DNA damage_Intra S-phase checkpoint                                                                          | 2.483E-02 | Cdt1, PP1-cat alpha, PP1-cat        |
| 46 | Apoptosis and survival_NGF/ TrkA PI3K-mediated signaling                                                     | 2.569E-02 | AKT1, MRLC, AKT(PKB)                |

|    |                                                                       |           |                                     |
|----|-----------------------------------------------------------------------|-----------|-------------------------------------|
| 47 | Role of inhibition of WNT signaling in the progression of lung cancer | 2.683E-02 | Keratin 18, Dsh                     |
| 48 | Immune response_IL-23 signaling pathway                               | 2.683E-02 | AKT1, AKT(PKB)                      |
| 49 | NETosis in SLE                                                        | 2.683E-02 | Histone H2, Histone H2A             |
| 50 | Development_Androgen receptor in non-reproductive systems development | 2.835E-02 | NCOA3 (pCIP/SRC3), AKT(PKB), SRD5A1 |

## Supplementary Figure S1

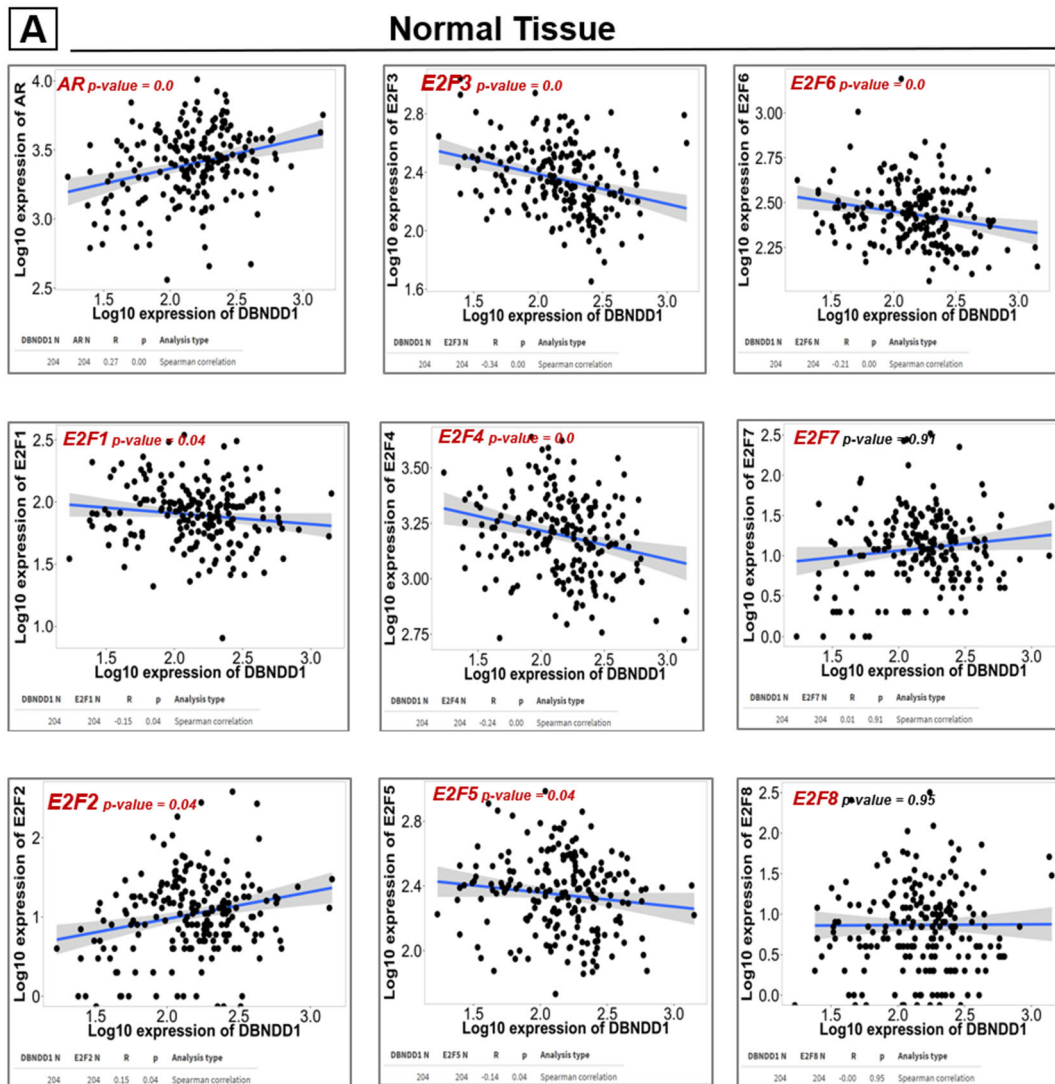

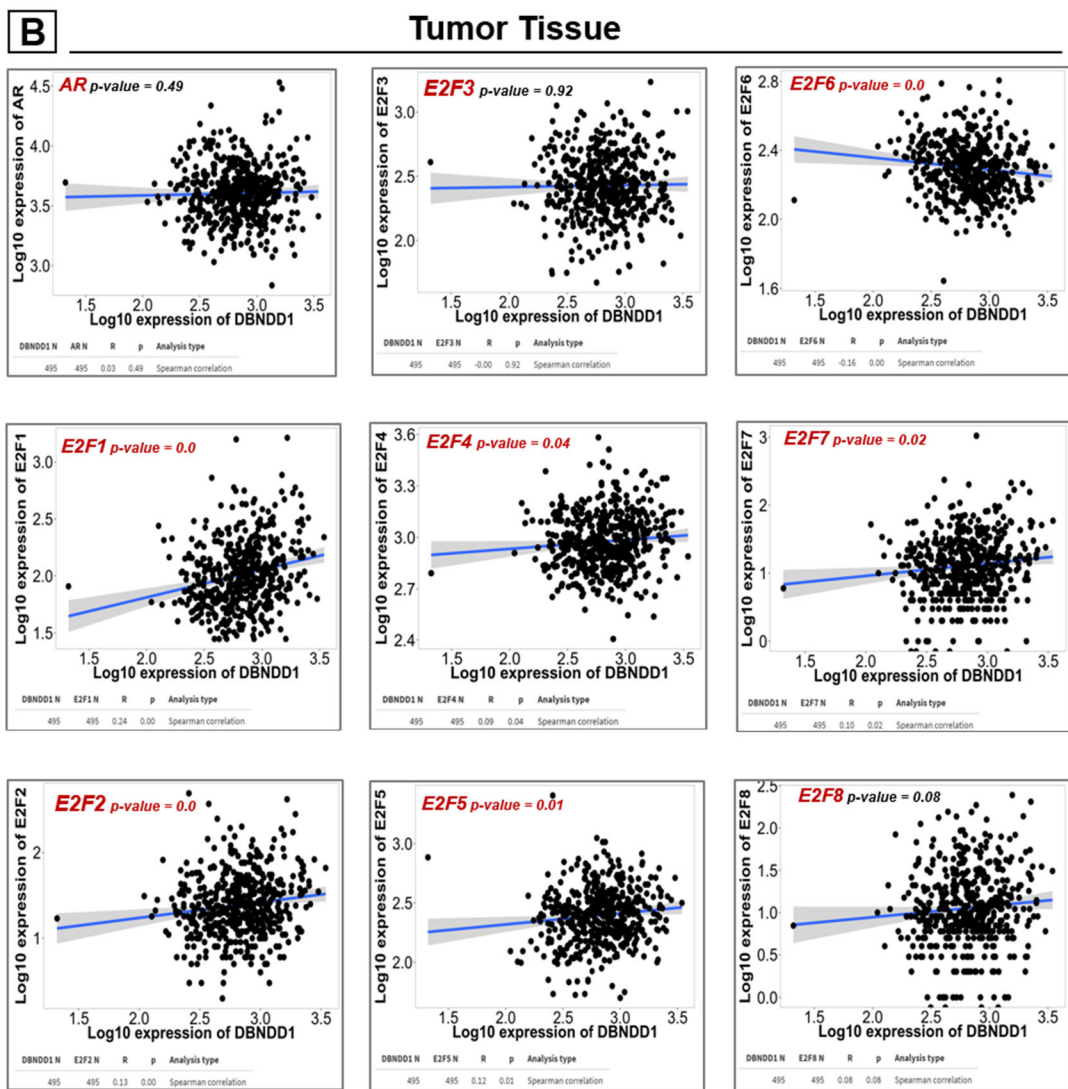

Supplementary Figure S1. Interactions of DBNDD1 expression with the androgen receptor (AR) and E2Fs in prostate cancer using RNA-seq data. The correlations between the genes were described using Spearman correlations ( $p < 0.05$  was considered statistically significant).

## Supplementary Figure S2

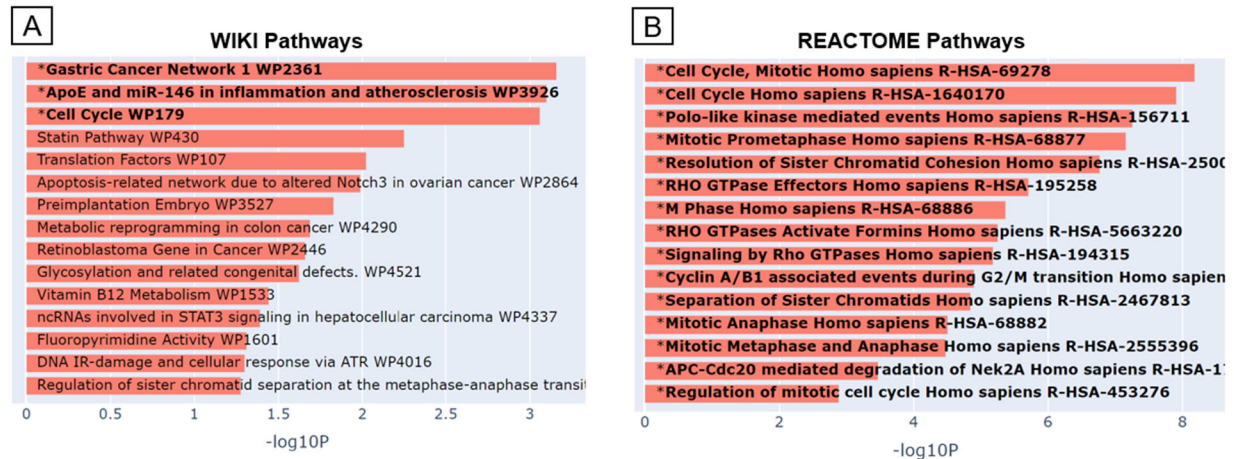

Supplementary Figure S2. Gene ontology (GO) enrichment results for primary tumor tissues vs. solid normal tissues in TCGA prostate cancer differential gene expression analysis. Results of an enrichment analysis including WIKI pathways (A), and Reactome pathways (B). Important phrases are emphasized in boldface font.

## Supplementary Figure S3

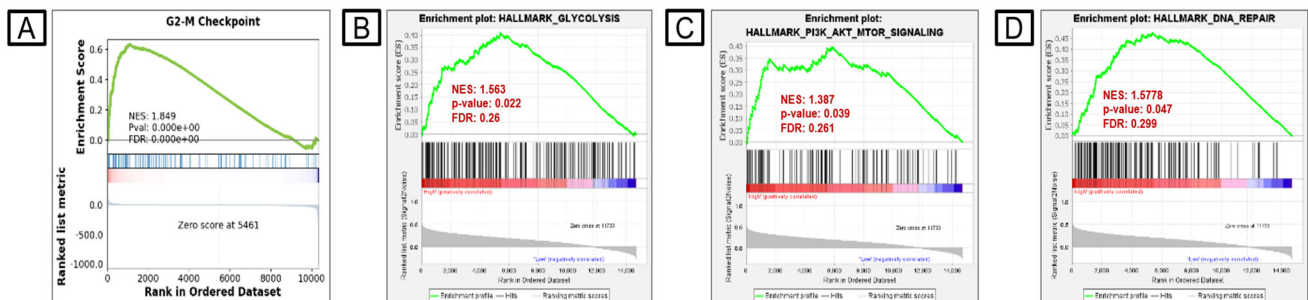

Supplementary Figure S3. Results of a gene set enrichment analysis (GSEA) in prostate cancer patients in TCGA cohort with high *DBNDD1* expression. (A-D) Patients were separated into two groups based on their *DBNDD1* mRNA expression levels in TCGA PRAD dataset; afterward, a gene ranking list was produced and entered into the GSEA. As indicated by the GSEA database, statistical significance was evaluated using a false detection rate (FDR) value of 0.25, a normalized enrichment score (NES) of more than 1.3,

and a nominal  $p$ -value of 0.05. Enrichment at the top of the list is indicated by a positive NES value, which suggests the enrichment pathway.

Supplementary Figure S4

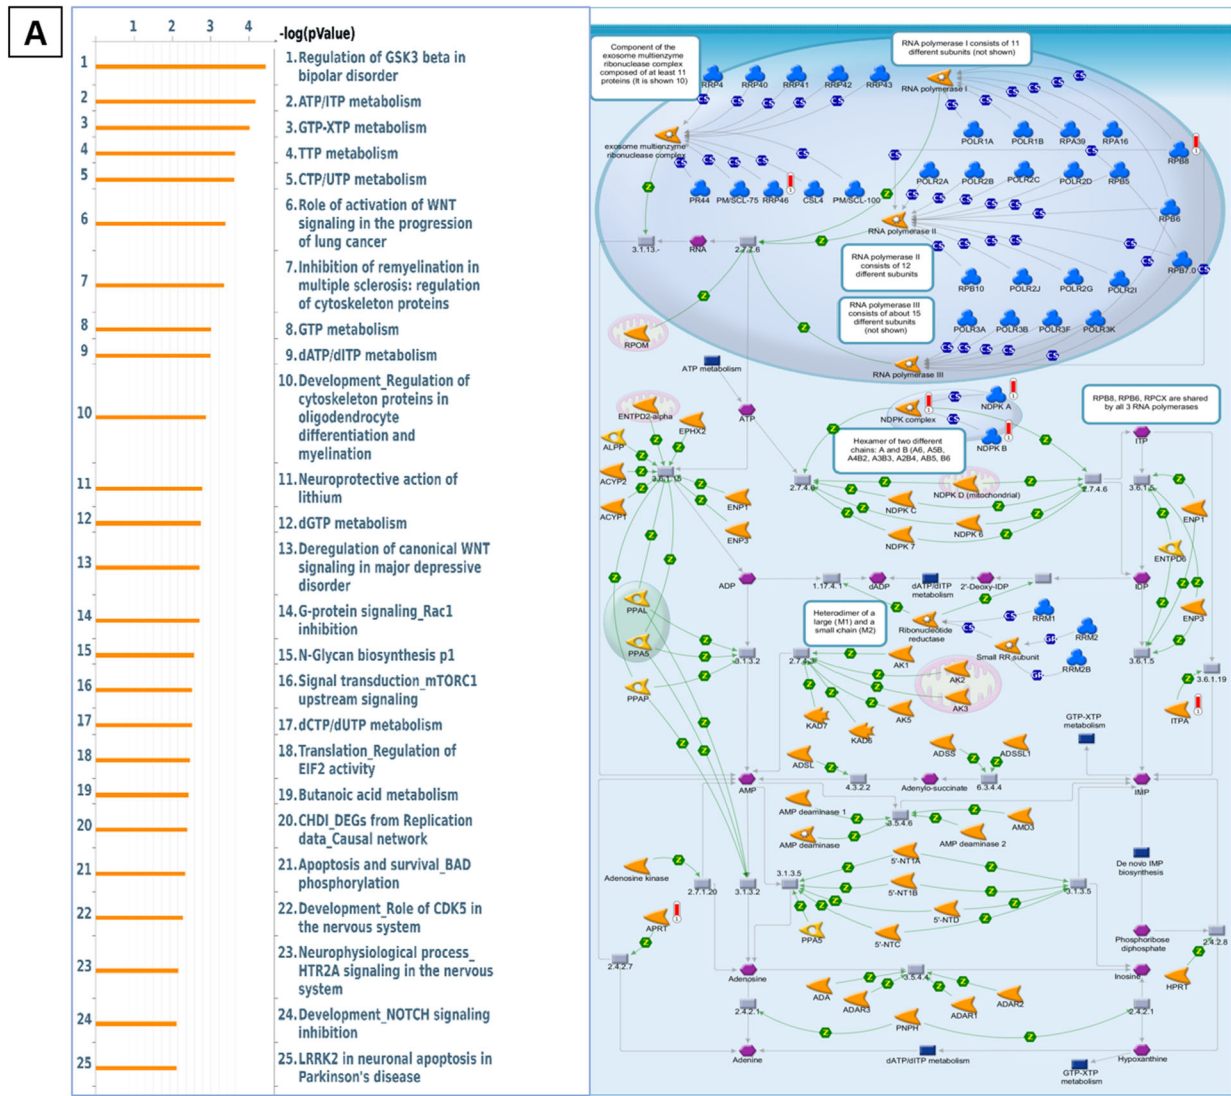



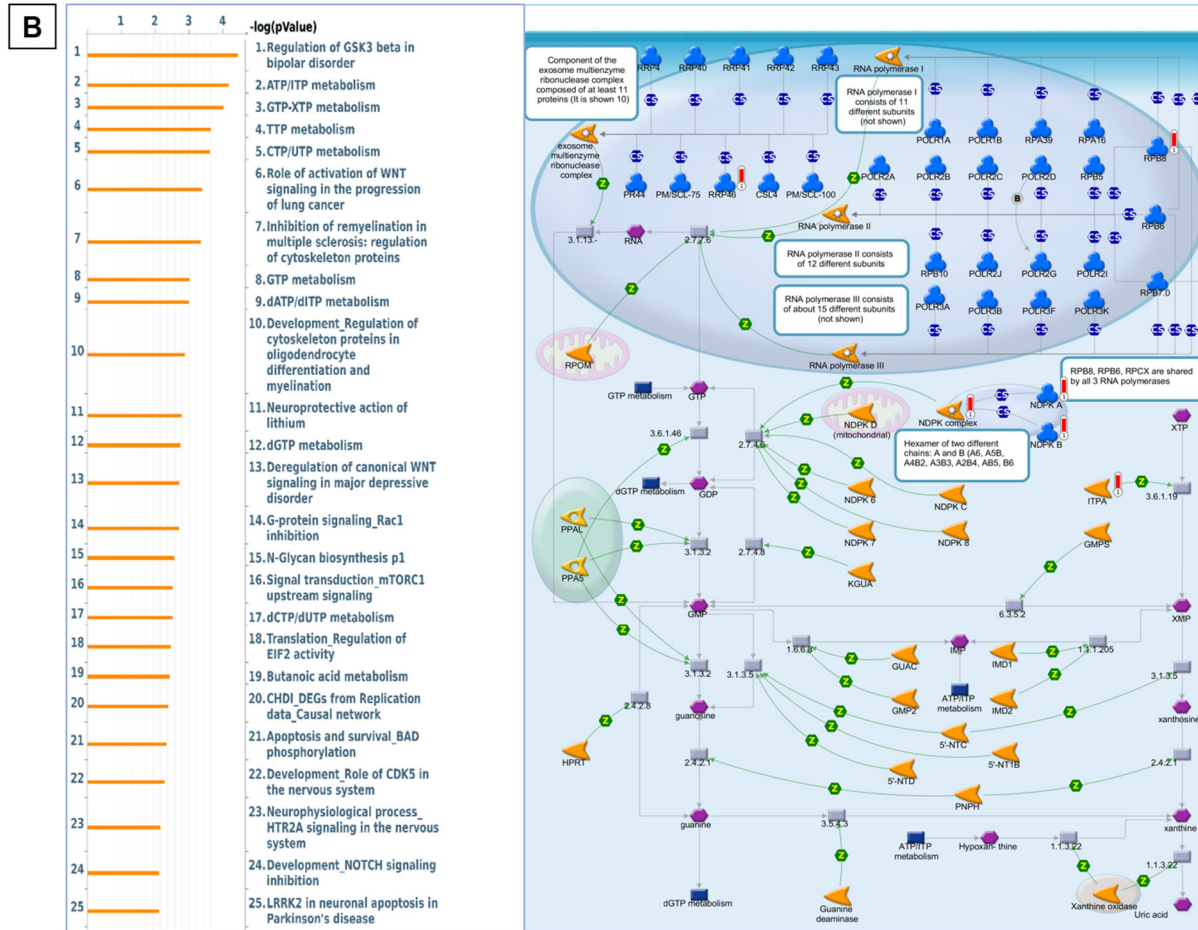

**Supplementary Figure S4. Expression of the DBNDD1 signaling pathway in PCa (MetaCore).** Using the Metacore platform to analyze genes co-expressed with DBNDD1 from the associated TCGA dataset, we found that (A) "ATP/ITP metabolism" and (B) "GTP-XTP metabolism" were linked to prostate cancer progression (with  $p < 0.05$  set as the cutoff value).

## Supplementary Figure S5

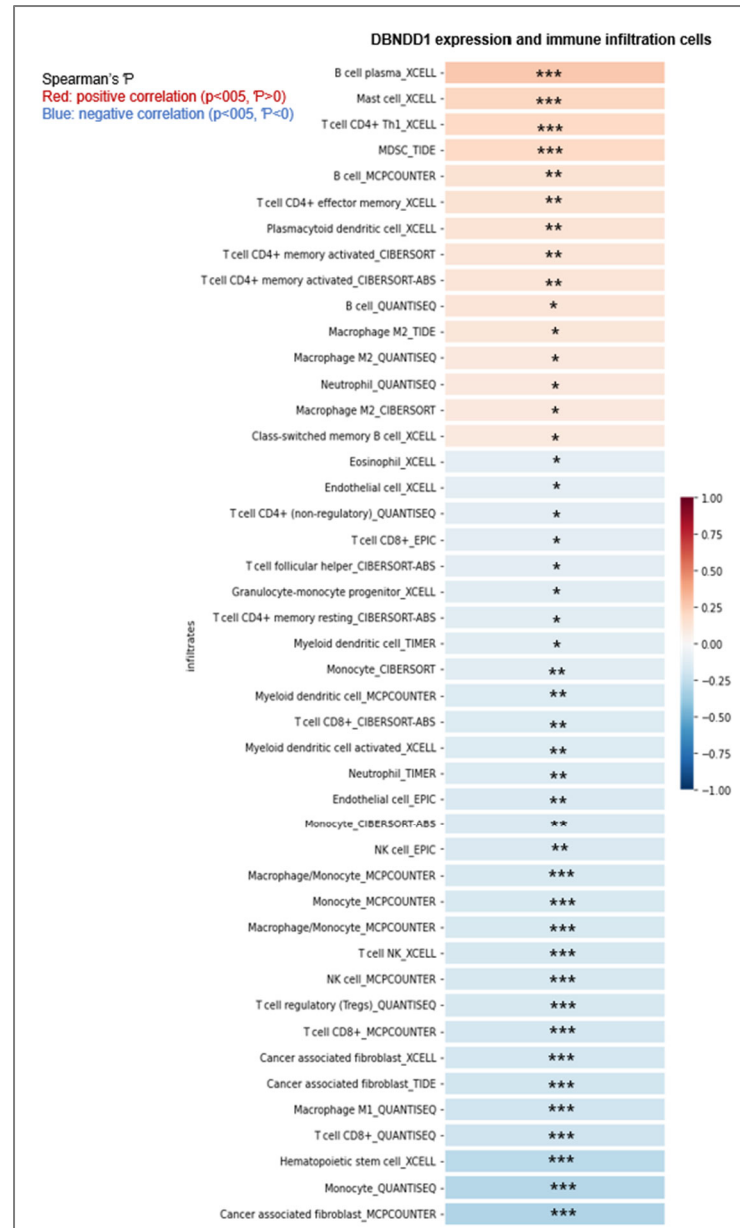

**Supplementary Figure S5. Relationships between DBNDD1 expression and immune cell infiltration in prostate cancer (TIMER).** Correlation coefficients were calculated using cell type quantification algorithms (xCell, Cibersort, Cibersort abs. mode, EPIC, TIDE, MCP-counter, TIMER, and QUANTISED) and are indicated by colors (blue:

negative correlations; red: positive correlations). Statistical significance was defined by  $p < 0.05$  (\*),  $p < 0.01$  (\*\*),  $p < 0.001$  (\*\*\*). Columns: subtypes of prostate cancer. Rows: immune infiltration levels.
